# Supplementary material
Source: PubMed Central journal article supplement (PMC2975172)

## Supplemental Data

Title: eNOS- $\beta$ -actin Interaction Contributes to Increased Peroxynitrite Formation During Hyperoxia in Pulmonary Artery Endothelial Cells and Mouse Lungs

Authors: Dmitry Kondrikov, Shawn Elms, David Fulton, and Yunchao Su

Supplemental Figure 1: Hyperoxia does not affect eNOS-Hsp90 association and phosphorylation of eNOS on Thr-495 and Ser 1177 in PAEC. PAEC were exposed to 95% oxygen for 1-24 h and then lysed in RIPA buffer. The cell lysates were subject to co-immunoprecipitation using anti-eNOS antibody as described in EXPERIMENTAL PROCEDURES. Then the protein contents of eNOS, Hsp90, phospho-eNOS on Thr-495 and Ser 1177 in the immuno-precipitates were determined using Western blot analysis. The images are representative immuno-blot from 3 experiments.

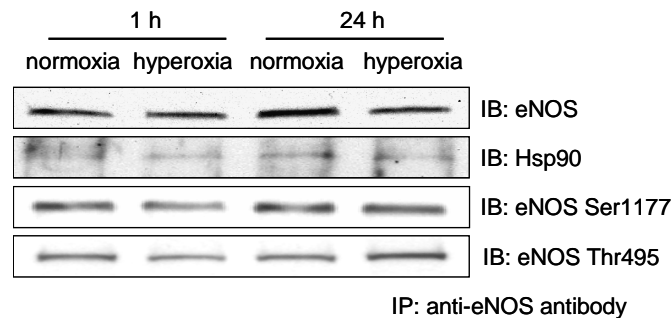

Supplemental Figure 2: Hyperoxia does not affect protein contents of nNOS and iNOS in mouse lungs. Male C57BL/6 mice were exposed to 85% oxygen for 5 days, then nNOS and iNOS protein in the lung homogenates were assayed as described in EXPERIMENTAL PROCEDURES. The images are representative immuno-blot from 3 experiments.

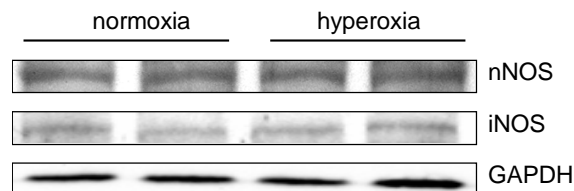

Supplement: supp_M110.140269_jbc.M110.140269-1.pdf [file supp_M110.140269_jbc.M110.140269-1.pdf]
